# Supplementary material for: Leveraging accreditation to integrate sustainable information literacy instruction into the medical school curriculum
Source: J Med Libr Assoc. 2018 Jul 1;106(3):377–82. doi: 10.5195/jmla.2018.276 (PMC6013141; doi:10.5195/jmla.2018.276)
Supplement: Appendix B [file jmla-106-377-s002.pdf]

## Leveraging accreditation to integrate sustainable information literacy instruction into the medical school curriculum

Natalie Tagge, MS

### APPENDIX B

#### Clinical reasoning conferences pretest questions

Q1. What is the best search to use in DynaMed to find the answer to this question: What are the symptoms of splenic injury?

- A. Splenic injury
- B. What are the symptoms of splenic injury?
- C. Splenic injury AND symptoms

Correct Answer: Splenic injury

Q2. Do a search for bee allergy in DynaMed? What is a **possible** risk factor?

- A. Spending time outdoors
- B. Bee keeping
- C. Consuming grape juice or newly pressed wine

Correct Answer: Consuming grape juice or newly pressed wine

Q3. What is the goal of a systematic review article?

- A. Answer a focused clinical question
- B. Provide a summary or overview of a topic
- C. Report on original research

Correct Answer: Answer a focused clinical question

Q4. What is a good method of finding a review article about lung cancer in PubMed?

- A. PubMed does not contain review articles
- B. Search for lung cancer and use the filters to limit to Review
- C. Search for lung cancer AND review article

Correct Answer: Search for lung cancer and use the filters to limit to Review

Q5. Do a search for heart attack in PubMed. According to the search details, what is the Medical Subject Heading (MeSH) for heart attack?

- A. Myocardial Infarction
- B. Heart Attack
- C. There is no MeSH for heart attack

Correct Answer: Myocardial Infarction

Q6. What is one advantage of textbooks being available in an online format?

- A. Online textbooks are free
- B. Online textbooks are easy to search
- C. Both A and B

Correct Answer: Online textbooks are easy to search
