# Supplementary material for: Leveraging accreditation to integrate sustainable information literacy instruction into the medical school curriculum
Source: PubMed Central journal article supplement (PMC6013141; doi:10.5195/jmla.2018.276), 2018-07-01
Supplement: jmla-106-377-s001.pdf [file jmla-106-377-s001.pdf]

## Leveraging accreditation to integrate sustainable information literacy instruction into the medical school curriculum

Natalie Tagge, MS

### APPENDIX A

#### Information literacy in student work rubric, Temple Health Sciences Libraries (version 2017/18)

| Learning outcome                 | Level of achievement                                                                                                                                                                                                                                                                   |                                                                                                                                                                                                                                                                                                                                                     |                                                                                                                                                                                                                                                                                        |                                                                                                                                                                                                                                                                                       |
|----------------------------------|----------------------------------------------------------------------------------------------------------------------------------------------------------------------------------------------------------------------------------------------------------------------------------------|-----------------------------------------------------------------------------------------------------------------------------------------------------------------------------------------------------------------------------------------------------------------------------------------------------------------------------------------------------|----------------------------------------------------------------------------------------------------------------------------------------------------------------------------------------------------------------------------------------------------------------------------------------|---------------------------------------------------------------------------------------------------------------------------------------------------------------------------------------------------------------------------------------------------------------------------------------|
|                                  | Highly developed<br>4                                                                                                                                                                                                                                                                  | Developed<br>3                                                                                                                                                                                                                                                                                                                                      | Emerging<br>2                                                                                                                                                                                                                                                                          | Initial<br>1                                                                                                                                                                                                                                                                          |
| <b>Inquiry</b>                   | <p><i>Expert articulation of information need.</i></p> <ul style="list-style-type: none"> <li>Constructs highly effective research strategy (e.g., keywords, sources) demonstrating sophisticated thought</li> </ul>                                                                   | <p><i>Satisfactory articulation of information need.</i></p> <ul style="list-style-type: none"> <li>Research strategy contains some flaws (e.g., misses obvious keyword synonyms or major databases) but is sound overall</li> </ul>                                                                                                                | <p><i>Partial articulation of information need.</i></p> <ul style="list-style-type: none"> <li>Research strategy contains multiple or major errors (e.g., irrelevant keywords or sources)</li> </ul>                                                                                   | <p><i>Poor to no articulation of information need.</i></p> <ul style="list-style-type: none"> <li>Poor to no research strategy (e.g., no keywords or sources)</li> </ul>                                                                                                              |
| <b>Evaluation of evidence</b>    | <p><i>Source materials employed demonstrate expertise and sophisticated independent thought.</i></p> <ul style="list-style-type: none"> <li>Uses appropriate and authoritative sources to support claims</li> <li>Demonstrates a knowledge of evidence and sources selected</li> </ul> | <p><i>Source materials are adequate and appropriate but lack variety or depth.</i></p> <ul style="list-style-type: none"> <li>Sources are used to support claim(s) but might not be the most authoritative source to make claim</li> <li>Demonstrates a preliminary critical exploration and knowledge of evidence, and sources selected</li> </ul> | <p><i>Source materials used are inadequate.</i></p> <ul style="list-style-type: none"> <li>Relies on largely inappropriate sources</li> <li>Clearly selected sources out of convenience</li> <li>Demonstrates little critical exploration and knowledge of sources selected</li> </ul> | <p><i>Source materials are absent or do not contribute to claim(s) or argument(s).</i></p> <ul style="list-style-type: none"> <li>When included, sources are too few or badly inappropriate</li> <li>No evidence of critical exploration and knowledge of sources selected</li> </ul> |
| <b>Communication of evidence</b> | <p><i>Evidence is integrated and synthesized expertly to support claims.</i></p> <ul style="list-style-type: none"> <li>Consistently presents evidence to support claim(s) and argument(s)</li> <li>Synthesizes and contextualizes evidence appropriately for audience</li> </ul>      | <p><i>Proficient synthesis and integration of evidence.</i></p> <ul style="list-style-type: none"> <li>Generally employs evidence to support claim(s) and argument(s)</li> <li>May present some evidence without context</li> </ul>                                                                                                                 | <p><i>Weak attempts at synthesis or integration.</i></p> <ul style="list-style-type: none"> <li>Sporadically uses evidence to support claim(s) or argument(s)</li> <li>Frequently fails to put sources into context (e.g. "says...")</li> </ul>                                        | <p><i>No evidence of attempt at synthesis or integration.</i></p> <ul style="list-style-type: none"> <li>Claim(s) or argument(s) lack necessary evidence</li> <li>Fails to contextualize evidence</li> </ul>                                                                          |

**Identification**

Group # \_\_\_\_\_ Scorer name \_\_\_\_\_ Program/Year \_\_\_\_\_

Quality of attribution, evaluation, and communication of IL (see rubric for details):

|                                  | <b>Highly developed<br/>(4)</b> | <b>Developed<br/>(3)</b> | <b>Emerging<br/>(2)</b> | <b>Initial<br/>(1)</b> | <b>Comments</b> | <b>Totals</b> |
|----------------------------------|---------------------------------|--------------------------|-------------------------|------------------------|-----------------|---------------|
| <b>Inquiry</b>                   |                                 |                          |                         |                        |                 |               |
| <b>Evaluation of sources</b>     |                                 |                          |                         |                        |                 |               |
| <b>Communication of evidence</b> |                                 |                          |                         |                        |                 |               |
|                                  |                                 |                          |                         |                        | Sum:            |               |

Edited 2017 by Natalie Tagge for the Temple Health Sciences Libraries. Rubric content adapted for the Claremont Colleges by Char Booth (char\_booth@cuc.claremont.edu), Sara Lowe (sara\_lowe@cuc.claremont.edu), Natalie Tagge (natalie\_tagge@cuc.claremont.edu), and Sean Stone (sean\_stone@uc.claremont.edu) from an instrument originally developed at Carleton College, Gould Library Reference and Instruction Department. Information literacy in student writing rubric and codebook. Northfield, MN: Carleton College; 2012. <<http://go.carleton.edu/6a>>. *This rubric version (2017/18) was revised summer–fall of 2017 and finalized September 2017.*
